# Supplementary material for: Association between Statin Use and Chemotherapy-Induced Cardiotoxicity: A Meta-Analysis
Source: MDPI journal article supplement (doi:10.3390/medicina60040580), 2024-03-31
Supplement: s1 [file s1]

## Supplementary materials

**Supplementary Table S1:** Search strategy among database,

**Supplementary Table S2:** Newcastle-Ottawa scale for quality assessment and bias assessment of observational studies.

**Supplementary Figure S1:** Risk of bias in randomized controlled trials by using Cochrane Collaboration's tool.

**Supplementary Figure S2** Funnel plots of primary outcome: LVEF

**Supplementary Figure S3** Funnel plots of outcome: Heart Failure

**Supplementary Figure S4** Leave-one-out analysis for LVEF

**Supplementary Figure S5** Leave-one-out analysis for LVEDV.

| Electronic database | Search strategy                                                                                                                                                                                                                                                                                                                                                  |
|---------------------|------------------------------------------------------------------------------------------------------------------------------------------------------------------------------------------------------------------------------------------------------------------------------------------------------------------------------------------------------------------|
| Pubmed              | ((((((((((breast cancer[MeSH Terms]) OR (lymphoma[Other Term])) OR (cancer[Other Term])) AND (chemotherapy[Other Term])) OR (anthracyclines[Other Term])) AND (statins, hmg coa[MeSH Terms])) OR (hmg coa statins[MeSH Terms])) OR (atorvastatin[Other Term])) OR (simvastatin[Other Term])) AND (heart failure[MeSH Terms])) OR (cardiomyopathies[MeSH Terms])) |

**Supplementary Table S1:** Search strategy

| Study | Selection | Comparability | Outcome | To |
|-------|-----------|---------------|---------|----|
|-------|-----------|---------------|---------|----|

| Author, year           | Representatives of exposed group | Selection of non-exposed cohort | Ascertainment of exposure | Outcome of interest |   | Outcome assessment | Adequacy of follow up duration | Adequacy of follow up of cohort |   |
|------------------------|----------------------------------|---------------------------------|---------------------------|---------------------|---|--------------------|--------------------------------|---------------------------------|---|
| Qadir et al            | 1                                | 1                               | 1                         | 1                   | 2 | 1                  | 0                              | 0                               | 7 |
| Arguell et al.         | 1                                | 1                               | 1                         | 1                   | 2 | 1                  | 1                              | 1                               | 9 |
| Seicean et al.         | 1                                | 1                               | 1                         | 1                   | 2 | 1                  | 0                              | 0                               | 7 |
| Chotenim itkhun et al. | 1                                | 1                               | 1                         | 1                   | 1 | 1                  | 1                              | 1                               | 8 |

**Supplementary Table S2.** Newcastle-Ottawa scale for quality assessment and bias assessment of observational studies.

|       |                     | Risk of bias domains                                                                                                                                                                                                                                        |    |    |    |    |                                           |
|-------|---------------------|-------------------------------------------------------------------------------------------------------------------------------------------------------------------------------------------------------------------------------------------------------------|----|----|----|----|-------------------------------------------|
|       |                     | D1                                                                                                                                                                                                                                                          | D2 | D3 | D4 | D5 | Overall                                   |
| Study | Nabati et al. 2019  |                                                                                                                                                                                                                                                             |    |    |    |    |                                           |
|       | Hundley et al. 2022 |                                                                                                                                                                                                                                                             |    |    |    |    |                                           |
|       | Acar et al. 2011    |                                                                                                                                                                                                                                                             |    |    |    |    |                                           |
|       | SPARE HF            |                                                                                                                                                                                                                                                             |    |    |    |    |                                           |
|       | STOP CA             |                                                                                                                                                                                                                                                             |    |    |    |    |                                           |
|       |                     | Domains:<br>D1: Bias arising from the randomization process.<br>D2: Bias due to deviations from intended intervention.<br>D3: Bias due to missing outcome data.<br>D4: Bias in measurement of the outcome.<br>D5: Bias in selection of the reported result. |    |    |    |    | Judgement<br>High<br>Some concerns<br>Low |

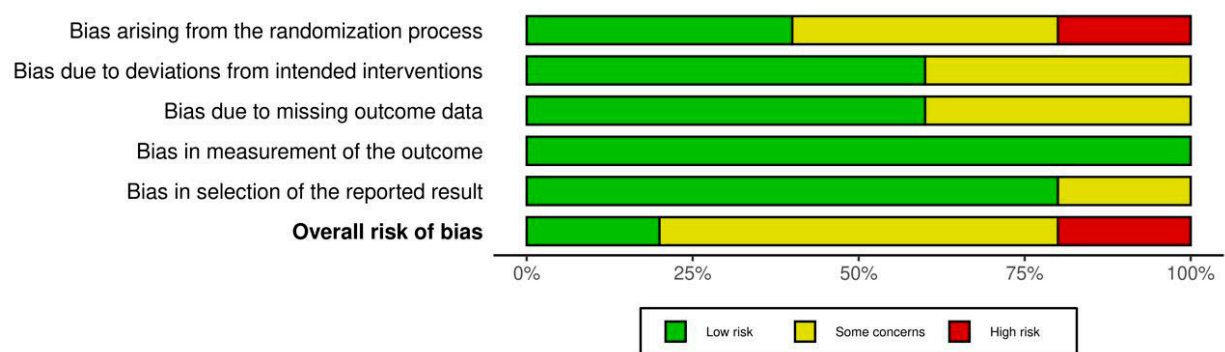

**Supplementary Figure S1:** Risk of bias in randomized controlled trials by using Cochrane Collaboration's tool.

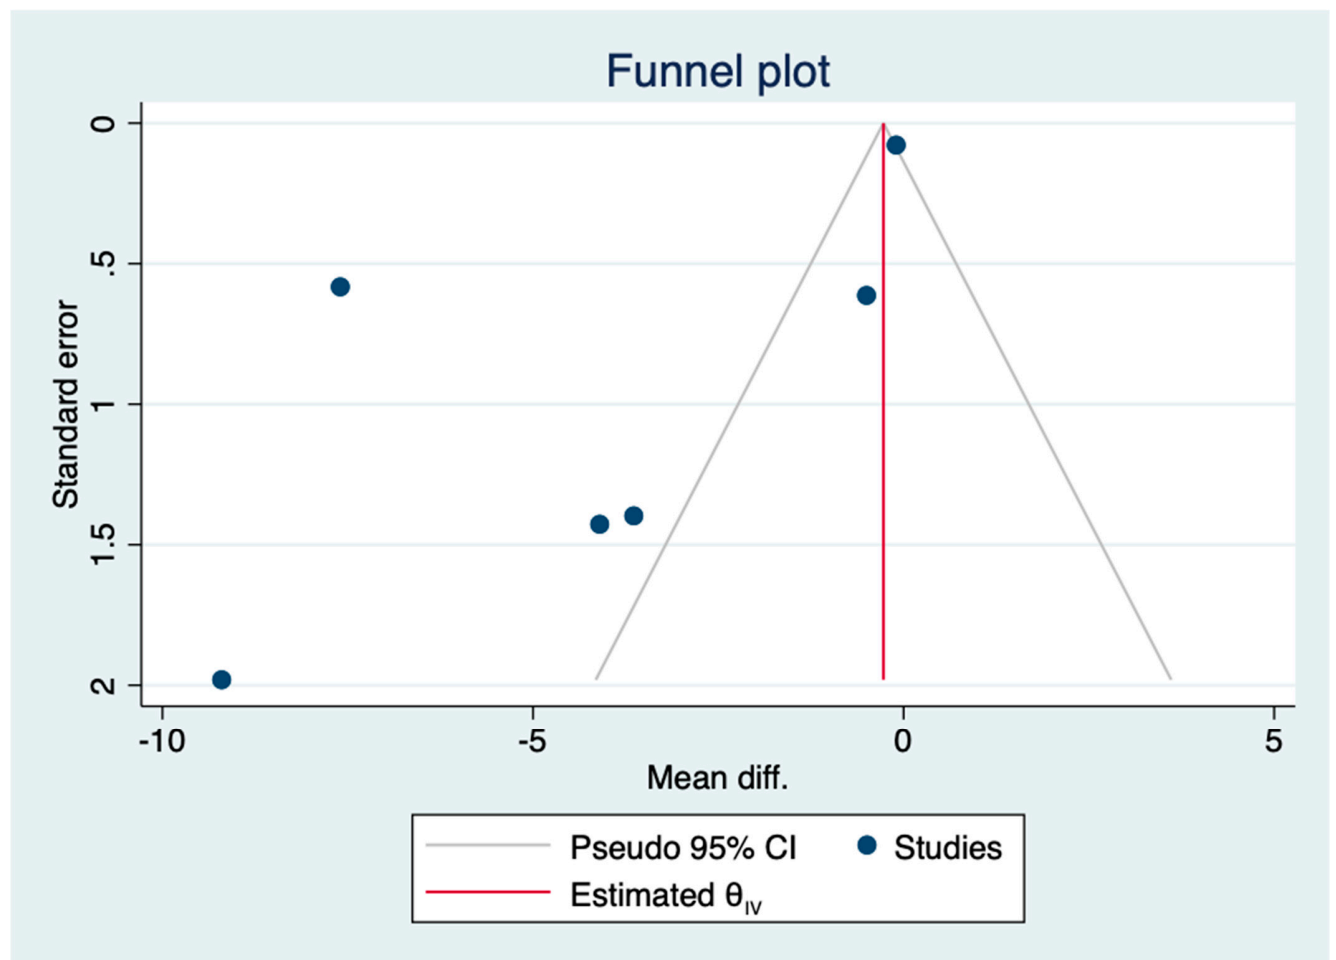

**Supplementary Figure S2** Funnel plots of primary outcome: LVEF

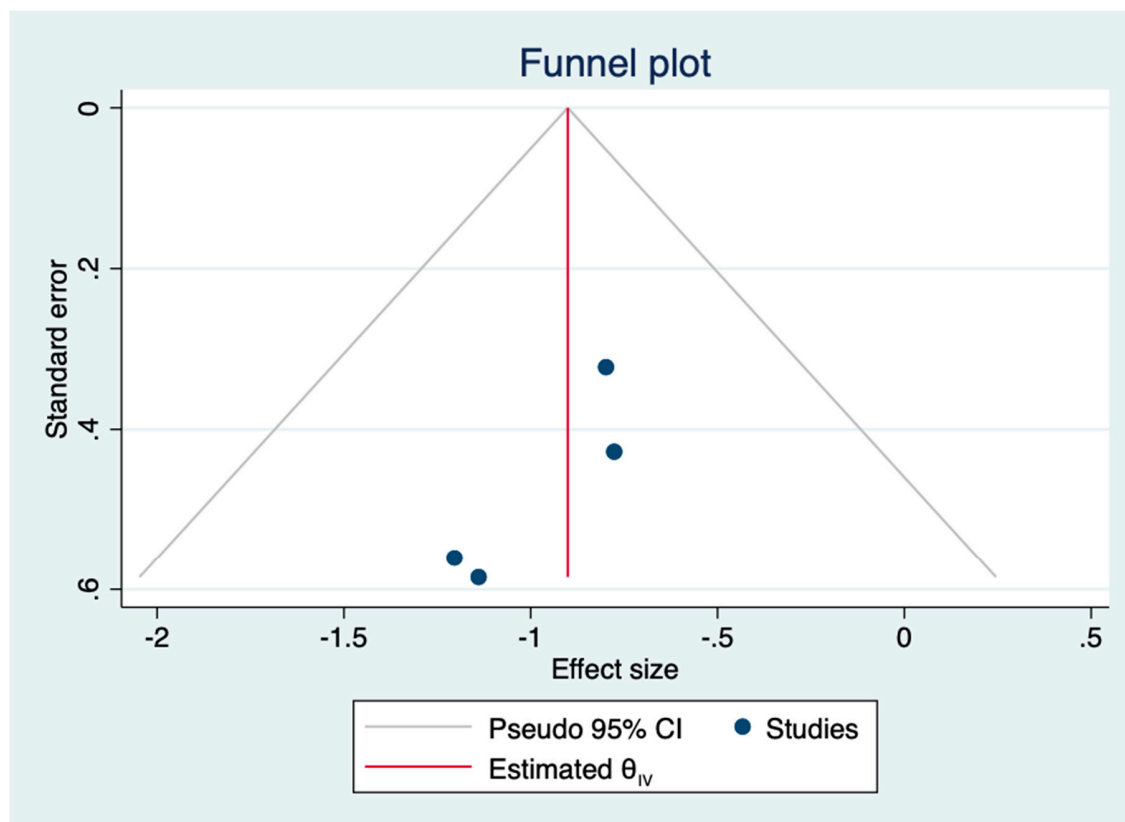

**Supplementary Figure S3** Funnel plots of outcome: Heart Failure

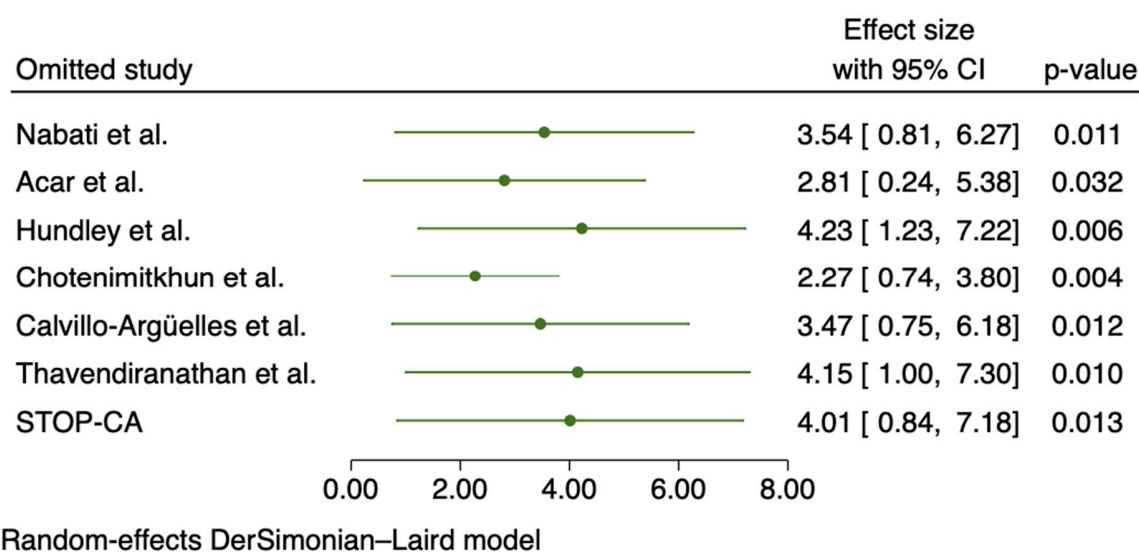

**Supplementary Figure S4** Leave-one-out analysis for LVEF

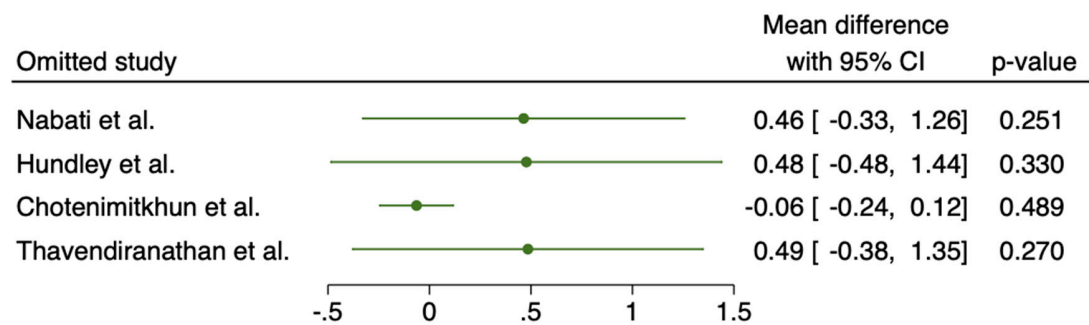

Random-effects DerSimonian–Laird model

**Supplementary Figure S5** Leave-one-out analysis for LVEDV.
